# Supplementary material for: The Intragenesis and Synthetic Biology Approach towards Accelerating Genetic Gains on Strawberry: Development of New Tools to Improve Fruit Quality and Resistance to Pathogens
Source: MDPI journal article supplement (doi:10.3390/plants11010057), 2021-12-25
Supplement: s1 [file s1]

---

Article

# **The Intragenesis and Synthetic Biology Approach towards Accelerating Genetic Gains on Strawberry: Development of New Tools to Improve Fruit Quality and Resistance to Pathogens**

## *Supplementary Materials.*

*Figure S1 Alignment of promoter and regulatory region of the strawberry AAT2 genes*

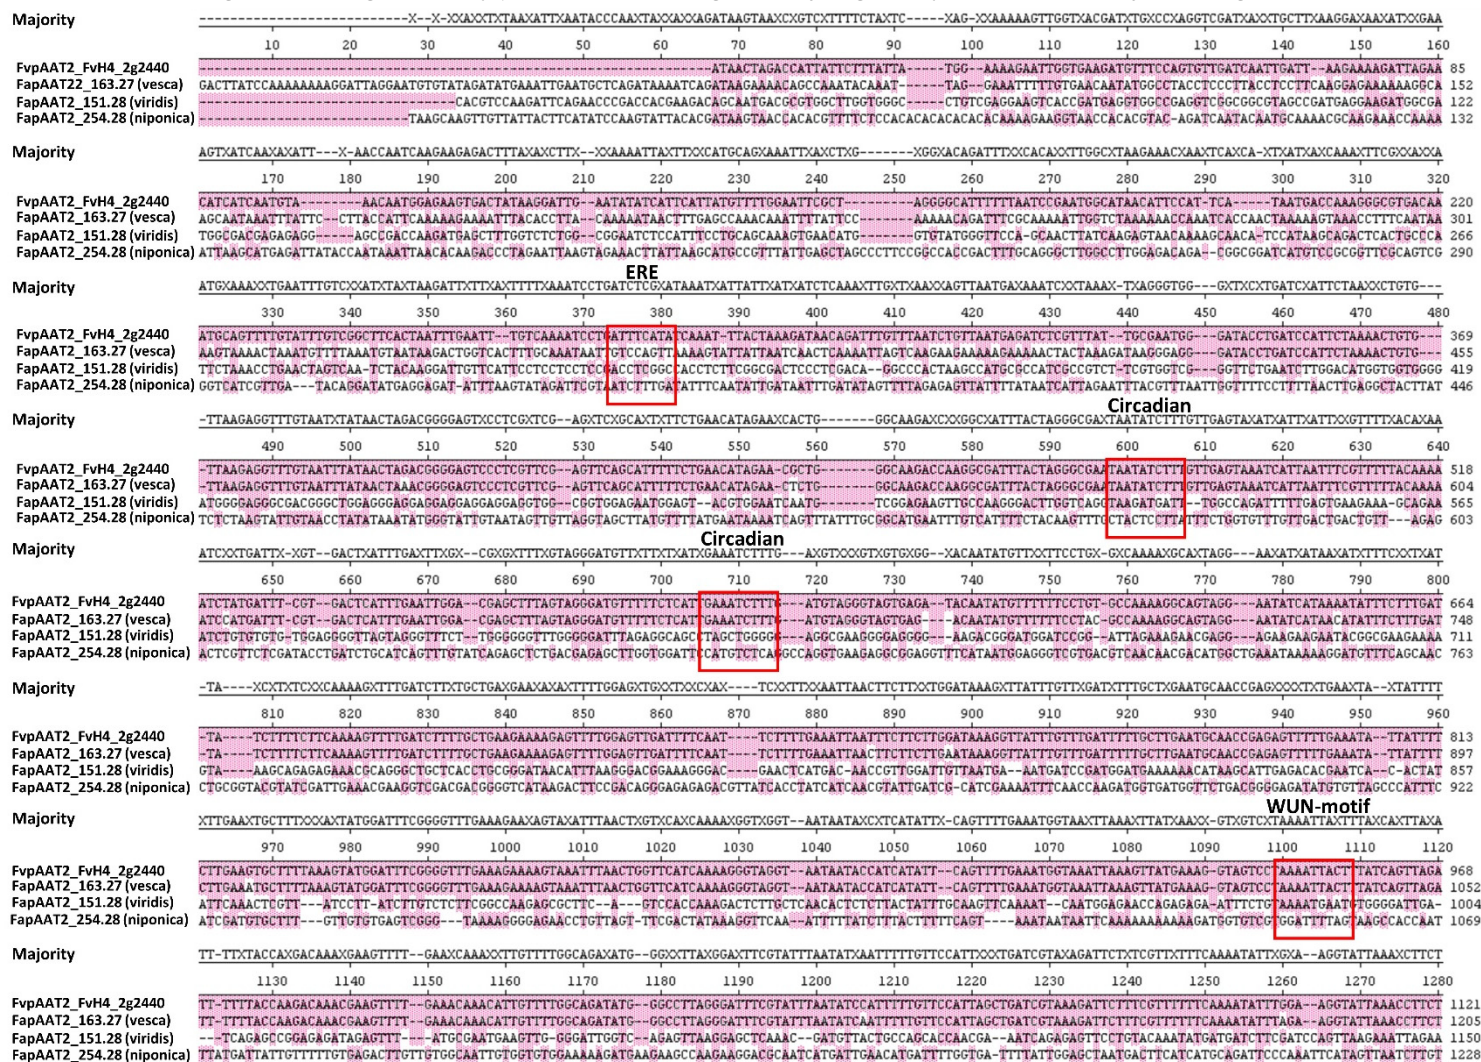

(Cont)



(Cont)



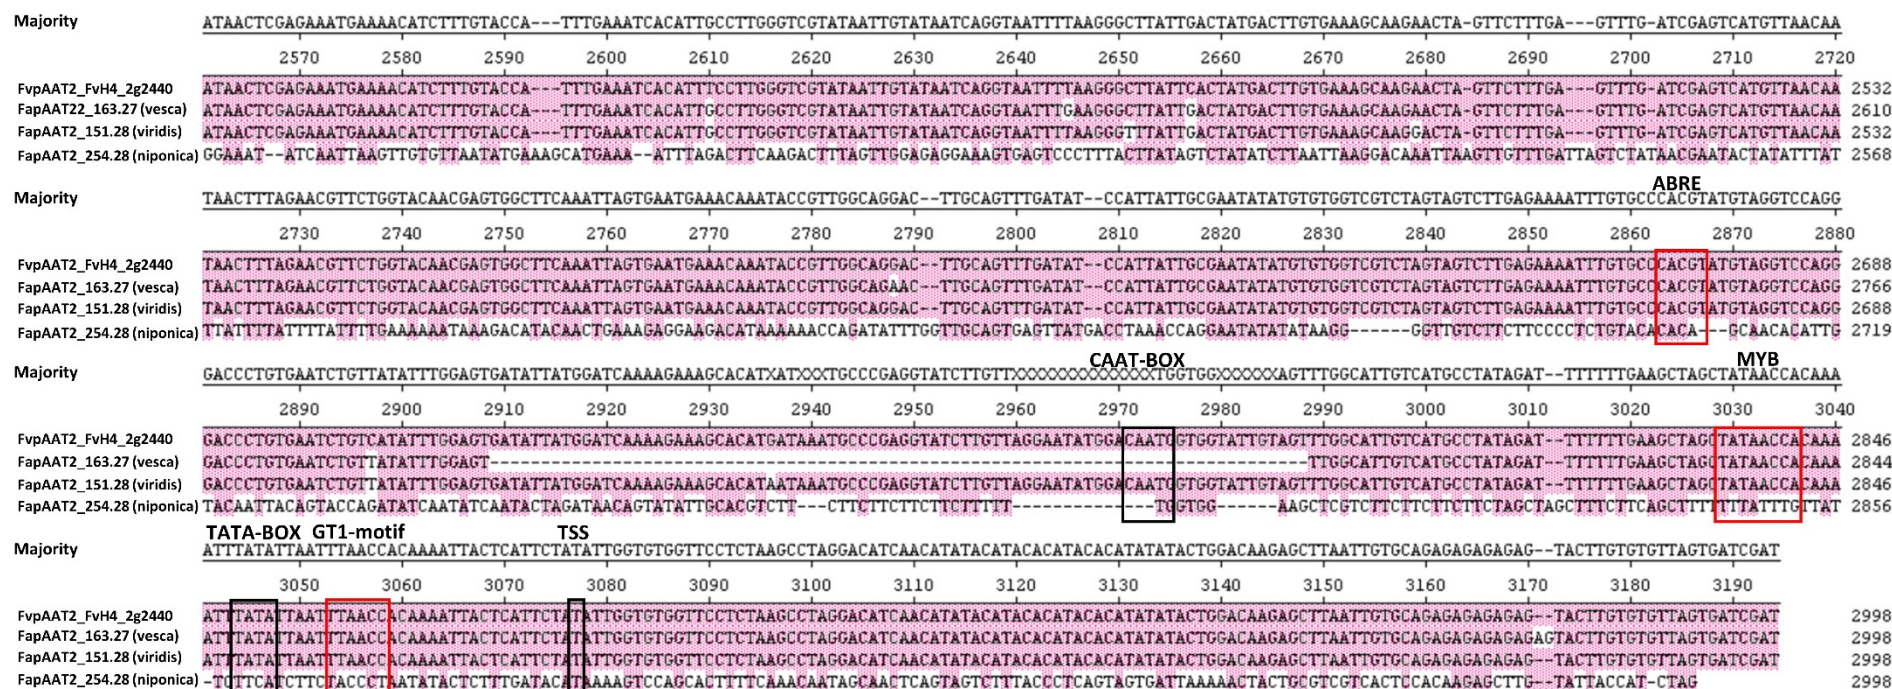

**Figure S1: Alignment of promoter and regulatory region of the strawberry AAT2 genes.** Alignment of the 2998 bp DNA fragment corresponding to the promoter and regulatory region of FvAAT2 (FvH4\_5g24240) with its respective homeologous of *Fragaria x ananassa* FapAAT2\_163.27, maker-Fvb5-1-snap-gene-163.27-mRNA-1 (Vesca homeologous); FapAAT2\_151.28, maker-Fvb5-2-snap-gene-151.28-mRNA-1 (Viridis homeologous); and FapAAT2\_254.28 maker-Fvb3-3-augustus-gene-254.28-mRNA-1 (niponica homeologous). The putative RNA Polymerase II TATA box and transcription start sites (TSS) (Black box) and cis-acting regulatory motifs (Red boxes) were predicted by PlantCare (<http://bioinformatics.psb.ugent.be/webtools/plantcare/html/>) and TSSplant v1.2016 (<http://www.softberry.com>). All sequences were retrieved of *Fragaria vesca* v.4.0a1 and *Fragaria x ananassa* Camarosa Genome v1.0.a1 Transcripts database. ERE: Ethylene Response Element; ABRE: Absciscic acid Response element; WUN-motif: wounding-responsive element; TCA element: SA-responsive elements.



Figure S2 Alignment of promoter and regulatory region of the strawberry DOF2 genes

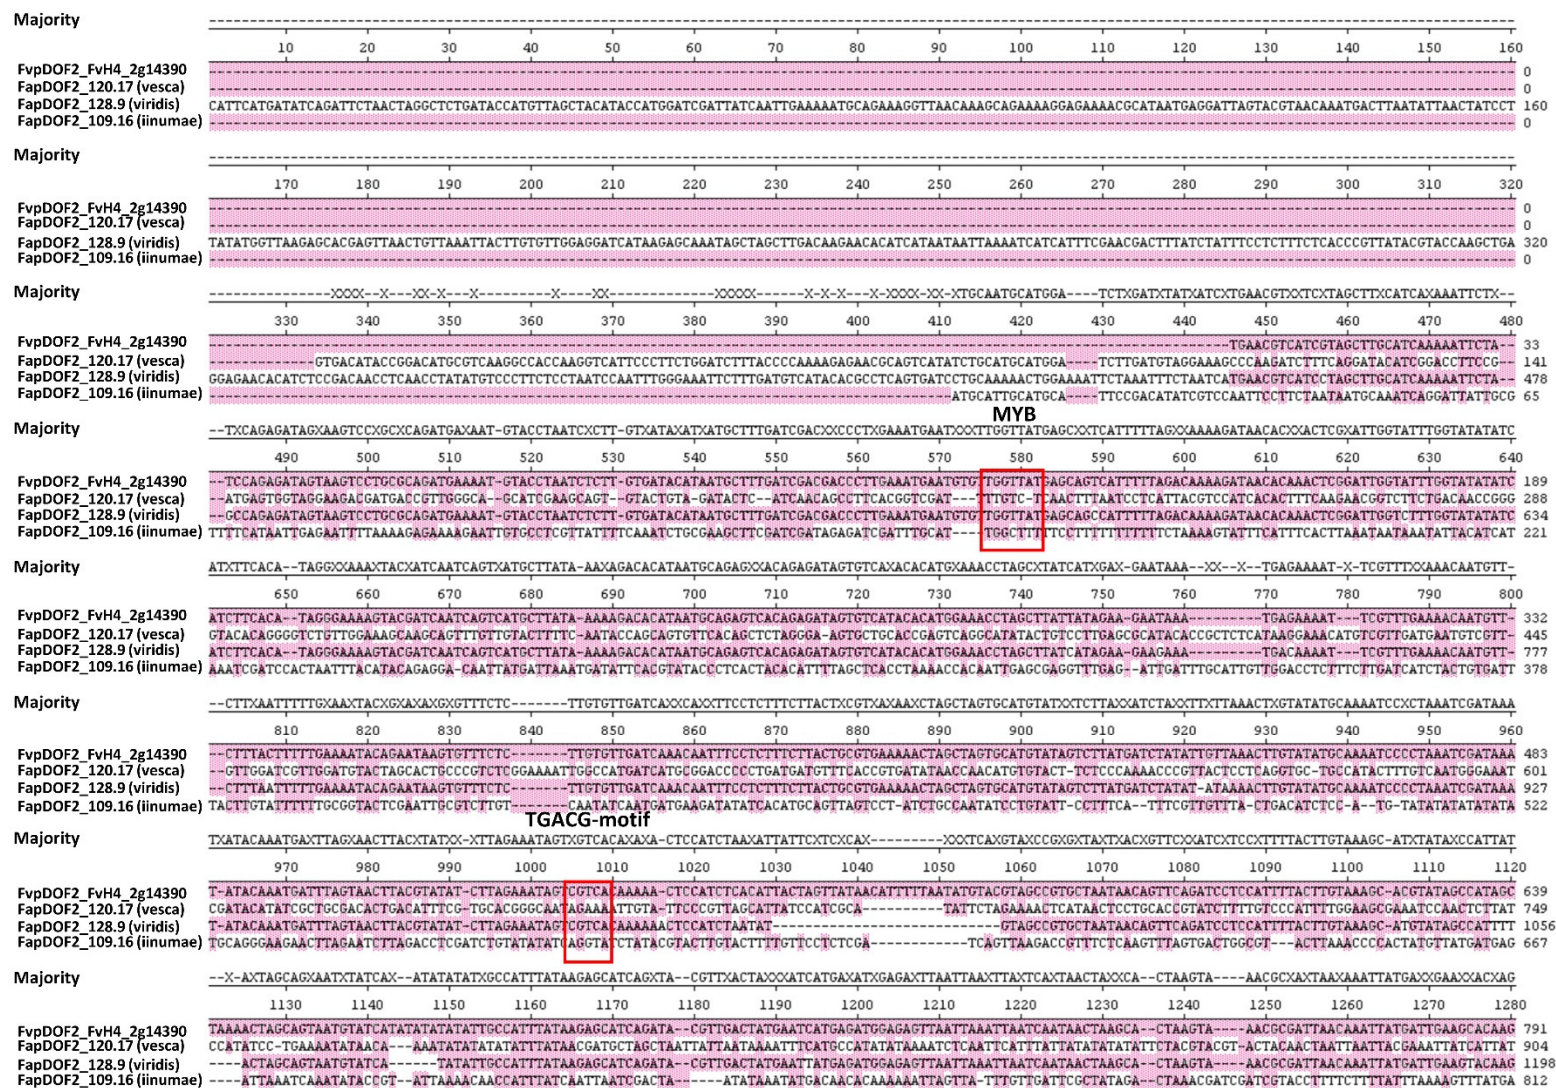



[illegible]

(Cont)



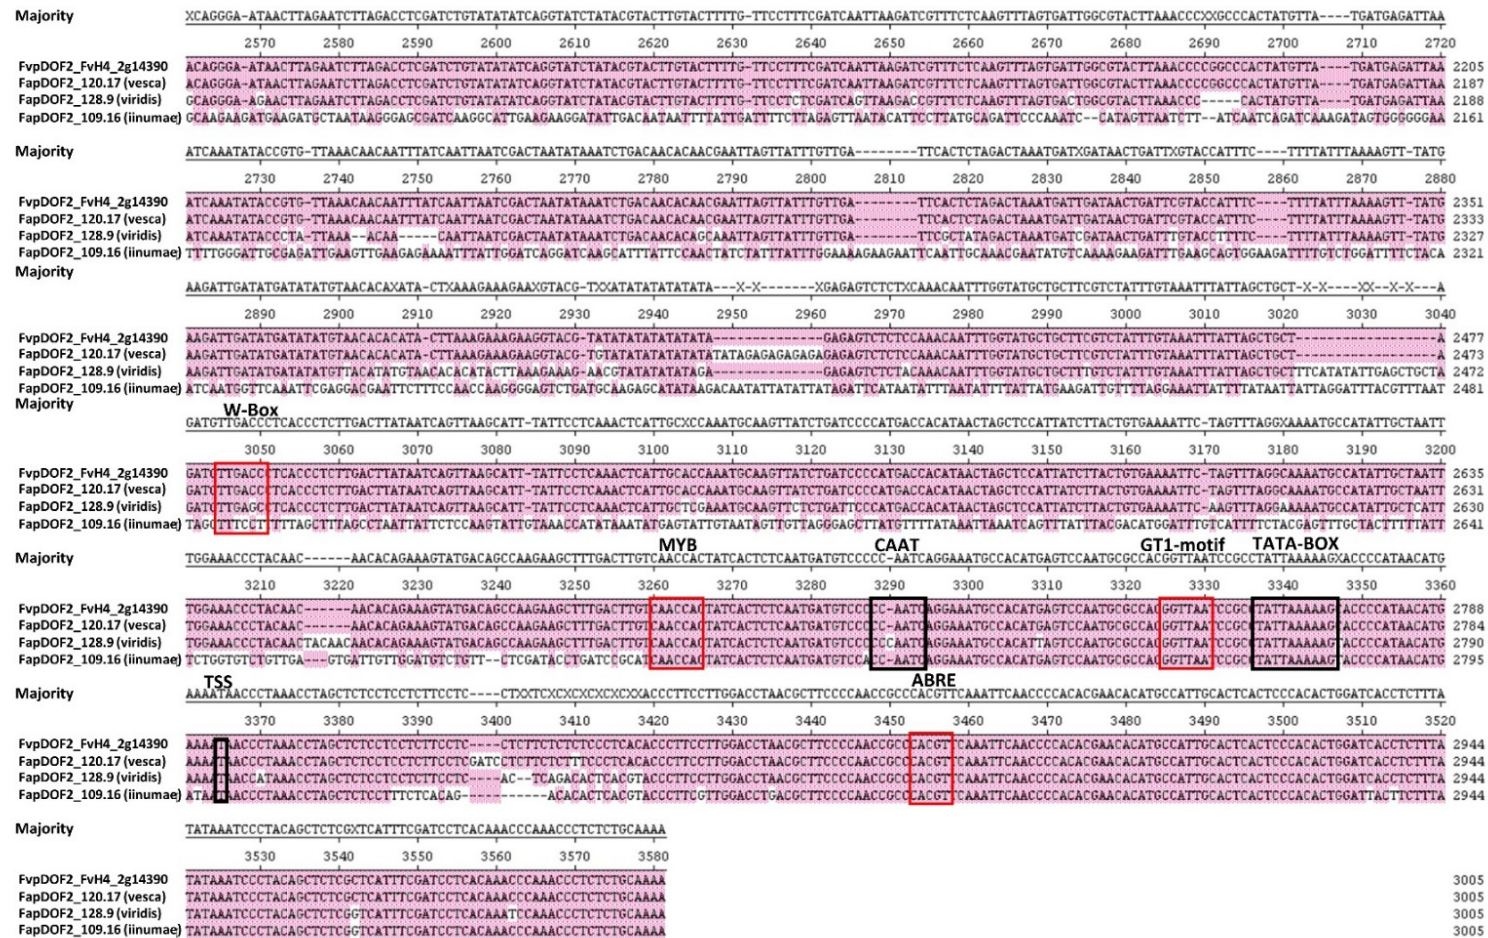

**Figure S2: Alignment of promoter and regulatory region of the strawberry DOF2 genes.** Alignment of the 3005 bp DNA fragment corresponding to promoter and regulatory region of the FvDOF2 (FvH4\_2g14390) with its respective homeologous of *Fragaria x ananassa* FapDOF2\_120.17, snap\_masked-Fvb2-2-processed-gene-120.17-mRNA-1 (Vesca homeologous); FapDOF2\_128.9, augustus\_masked-Fvb2-3-processed-gene-128.9-mRNA-1 (Viridis homeologous); and FapDOF2\_109.16 snap\_masked-Fvb2-4-processed-gene-109.16-mRNA-1 (liunumae homeologous). The putative RNA Polymerase II TATA box and transcription start sites (TSS) (Black box) and cis-acting regulatory motif (Red boxes) were predicted by

---

*PlantCare* (<http://bioinformatics.psb.ugent.be/webtools/plantcare/html/>) and *TSSplant v1.2016* (<http://www.softberry.com>). All sequences were retrieved of *Fragaria vesca* v.4.0a1 and *Fragaria x ananassa* Camarosa Genome v1.0.a1 Transcripts database. ERE: Ethylene Response Element; ABRE: Absciscic acid Response element; WUN-motif: wounding-responsive element; TCA element: SA-responsive elements.



Figure S3 Phylogenetic tree and identity percentage of NPR gene family in strawberry and *A. thaliana*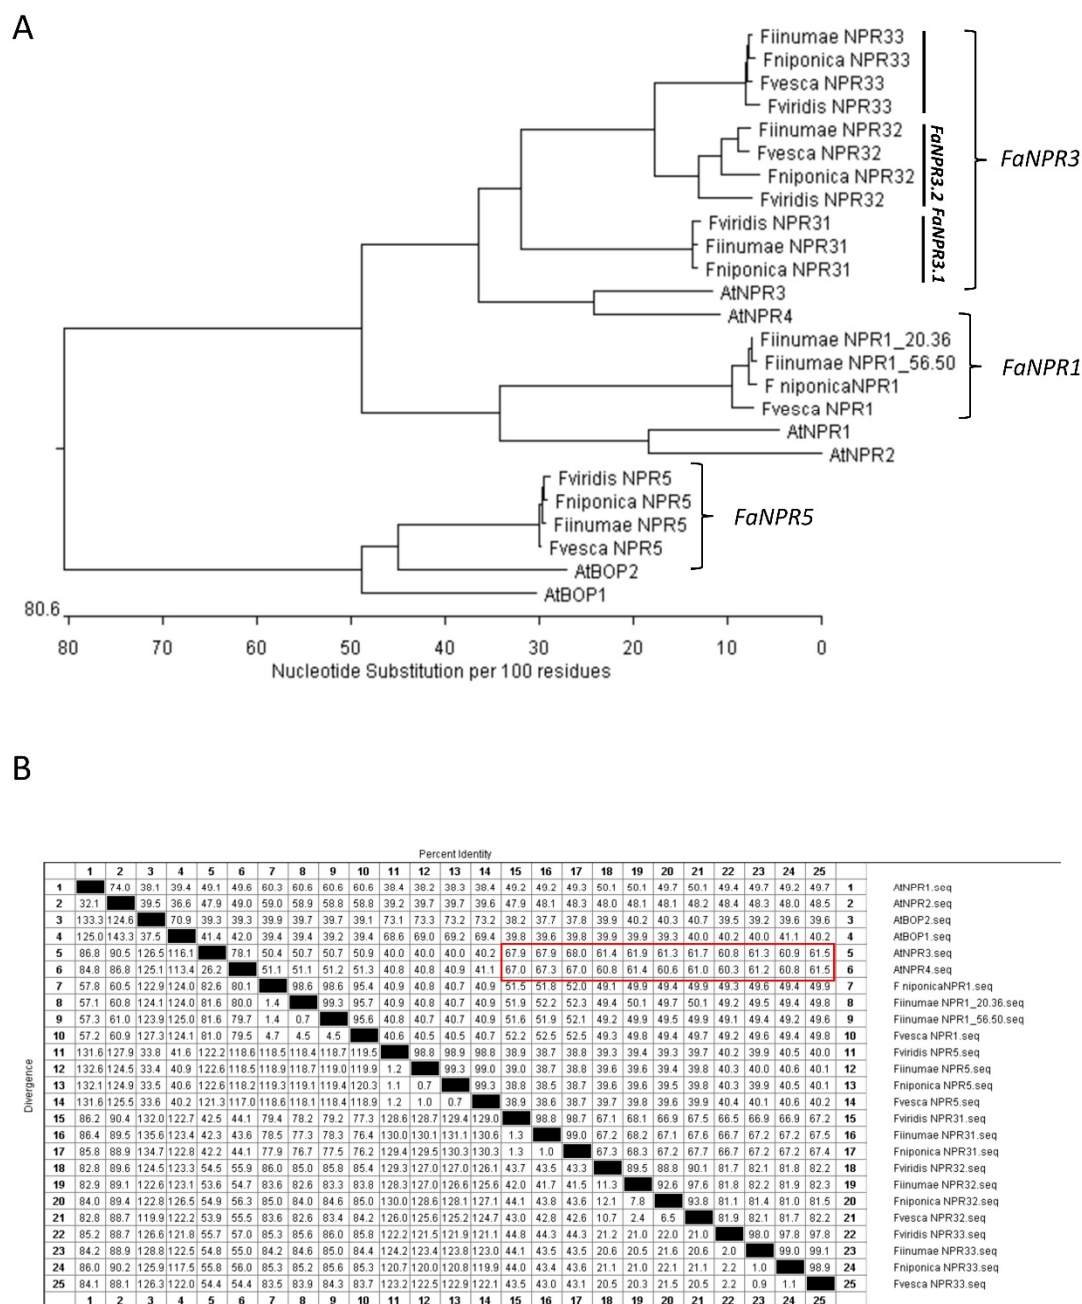

**Figure S3. Phylogenetic tree and identity percentage of NPR gene family in strawberry and *A. thaliana*. (A)** Phylogenetic analysis of five members of *Fragaria ananassa* NPR gene family and six member of *A. thaliana*. The sequences were aligned and analyzed by clustalW method with 1000 bootstrap replications. Numbers on branches are the bootstrap values. The scale bar at the bottom indicates the evolutionary distance. **(B)** Divergence and percentage identity of nucleotide sequences of NPR gene family between *F. x ananassa* and *Arabidopsis thaliana*. The nucleotide sequence of *AtNPR3/4* present the similar percentage (around 60 to 70%) of homologous with respect to *Fragaria* NPR3 gene family (Red Box). *Fragaria ananassa* sequences correspond to *Fiinumae* NPR1\_20.36, *maker-Fvb1-2-augustus-gene-20.36-mRNA-1*; *Fiinumae* NPR1\_56.50, *maker-Fvb1-2-augustus-gene-56.50-mRNA-1*; *Fvesca* NPR1, *maker-Fvb1-4-augustus-gene-33.69-mRNA-1*; *Fniponica* NPR1, *maker-Fvb1-3-augustus-gene-37.59-mRNA-1*; *Fniponica* NPR31, *maker-Fvb3-3-augustus-gene-47.46-*

*mRNA-1; Fiinumae NPR31, maker-Fvb3-2-augustus-gene-63.42-mRNA-1 and Fviridis NPR31, maker-Fvb3-1-augustus-gene-256.35-mRNA-1. The corresponding homeolog to FaNPR32 and FaNPR33 are named as Fviridis NPR32, maker-Fvb6-4-augustus-gene-288.39-mRNA-1; Fiinumae NPR32, maker-Fvb6-3-augustus-gene-80.33-mRNA-1; Fvesca NPR32, maker-Fvb6-1-augustus-gene-87.19-mRNA-1; Fniponica NPR32, maker-Fvb6-2-snap-gene-357.51-mRNA-1; Fviridis NPR33, maker-Fvb6-4-augustus-gene-288.38-mRNA-1; Fiinumae NPR33, maker-Fvb6-3-augustus-gene-80.34-mRNA-1; Fvesca NPR33, maker-Fvb6-1-augustus-gene-87.20-mRNA-1 and Fniponica NPR33, snap\_masked-Fvb6-2-processed-gene-357.26-mRNA-1; Fvesca NPR5, maker-Fvb6-1-augustus-gene-182.42-mRNA-1; Fniponica NPR5, maker-Fvb6-2-augustus-gene-104.36-mRNA-1; Fviridis NPR5, maker-Fvb6-3-augustus-gene-192.35-mRNA-1; Fiinumae NPR5, maker-Fvb6-4-augustus-gene-184.25-mRNA-1. For the Arabidosis NPR sequence, NPR1: At1g64280; NPR2: At4g26120; NPR3At5g45110; NPR4: At4g19660; NPR5(BOP2); At2g41370; NPR6(BOP1); At3g572130.*



**FigureS4 Candidate DNA fragments of the strawberry *FaWRKY1* gene for dsRNA production (siRNAs).**

**A**

| Nº | Sequence (5'-3')      | Start |
|----|-----------------------|-------|
| 1  | GGATACCTACCCAGCATTCTA | 3     |
| 2  | GCATTCTATTCTTCTCATCA  | 16    |
| 3  | GGTGAACACTCATCCTCATCA | 78    |
| 4  | GTGAACACTCATCCTCATCAT | 79    |
| 5  | GAGGTTTCGAACAGCATGAGT | 175   |
| 6  | GTTTCGAACAGCATGAGTAGT | 178   |
| 7  | GTGAAAGTAATACAGCAGTAA | 213   |
| 8  | GAAAGTAATACAGCAGTAAGA | 215   |

**C**

| Nº | siRNA | Homeologous            | Target Name                              | E-value     | ID |
|----|-------|------------------------|------------------------------------------|-------------|----|
| 1  | 1     | <i>F.viridisWRKY1</i>  | maker-Fvb4-4-augustus-gene-72.68-mRNA-1  | 0.000819148 | 21 |
| 2  | 1     | <i>F.vescaWRKY1</i>    | maker-Fvb4-3-augustus-gene-105.32-mRNA-1 | 0.000819148 | 21 |
| 3  | 1     | <i>F.niponicaWRKY1</i> | maker-Fvb4-2-augustus-gene-73.40-mRNA-1  | 0.000819148 | 21 |
| 4  | 2     | <i>F.viridisWRKY1</i>  | maker-Fvb4-4-augustus-gene-72.68-mRNA-1  | 0.000819148 | 21 |
| 5  | 2     | <i>F.vescaWRKY1</i>    | maker-Fvb4-3-augustus-gene-105.32-mRNA-1 | 0.000819148 | 21 |
| 6  | 2     | <i>F.niponicaWRKY1</i> | maker-Fvb4-2-augustus-gene-73.40-mRNA-1  | 0.000819148 | 21 |
| 7  | 3     | <i>F.vescaWRKY1</i>    | maker-Fvb4-3-augustus-gene-105.32-mRNA-1 | 0.000819148 | 21 |
| 8  | 3     | <i>F.niponicaWRKY1</i> | maker-Fvb4-2-augustus-gene-73.40-mRNA-1  | 0.000819148 | 21 |
| 9  | 4     | <i>F.vescaWRKY1</i>    | maker-Fvb4-3-augustus-gene-105.32-mRNA-1 | 0.000819148 | 21 |
| 10 | 4     | <i>F.niponicaWRKY1</i> | maker-Fvb4-2-augustus-gene-73.40-mRNA-1  | 0.000819148 | 21 |
| 11 | 5     | <i>F.viridisWRKY1</i>  | maker-Fvb4-4-augustus-gene-72.68-mRNA-1  | 0.000819148 | 21 |
| 12 | 5     | <i>F.vescaWRKY1</i>    | maker-Fvb4-3-augustus-gene-105.32-mRNA-1 | 0.000819148 | 21 |
| 13 | 5     | <i>F.niponicaWRKY1</i> | maker-Fvb4-2-augustus-gene-73.40-mRNA-1  | 0.000819148 | 21 |
| 14 | 6     | <i>F.viridisWRKY1</i>  | maker-Fvb4-4-augustus-gene-72.68-mRNA-1  | 0.000819148 | 21 |
| 15 | 6     | <i>F.vescaWRKY1</i>    | maker-Fvb4-3-augustus-gene-105.32-mRNA-1 | 0.000819148 | 21 |
| 16 | 6     | <i>F.niponicaWRKY1</i> | maker-Fvb4-2-augustus-gene-73.40-mRNA-1  | 0.000819148 | 21 |
| 17 | 7     | <i>F.viridisWRKY1</i>  | maker-Fvb4-4-augustus-gene-72.68-mRNA-1  | 0.000819148 | 21 |
| 18 | 7     | <i>F.vescaWRKY1</i>    | maker-Fvb4-3-augustus-gene-105.32-mRNA-1 | 0.000819148 | 21 |
| 19 | 7     | <i>F.niponicaWRKY1</i> | maker-Fvb4-2-augustus-gene-73.40-mRNA-1  | 0.000819148 | 21 |
| 20 | 8     | <i>F.viridisWRKY1</i>  | maker-Fvb4-4-augustus-gene-72.68-mRNA-1  | 0.000819148 | 21 |
| 21 | 8     | <i>F.vescaWRKY1</i>    | maker-Fvb4-3-augustus-gene-105.32-mRNA-1 | 0.000819148 | 21 |
| 22 | 8     | <i>F.niponicaWRKY1</i> | maker-Fvb4-2-augustus-gene-73.40-mRNA-1  | 0.000819148 | 21 |

**B**

| Nº | Sequence (5'-3')        | Start |
|----|-------------------------|-------|
| 9  | ACCTACCCAGCATTCTATTCTT  | 7     |
| 10 | CAGCATTCTATTCTTCTCATCA  | 14    |
| 11 | TGCTTCTTCGCTGTCATTGAACA | 54    |
| 12 | TTCGCTGTCATTGAACATGGTGA | 60    |
| 13 | ATGGTGAACACTCATCCTCATCA | 76    |
| 14 | GTGAACACTCATCCTCATCATGC | 79    |
| 15 | AAGCTAGCAATAACAAGGAAAAT | 125   |
| 16 | GTCAGAGATGGAGGTTTCAACA  | 165   |
| 17 | TGGAGGTTTCAACAGCATGAGT  | 173   |
| 18 | TTCGAACAGCATGAGTAGTATTA | 180   |
| 19 | GGGGAGGGTGAAAGTAATACAGC | 226   |
| 20 | GAGGGTGAAAGTAATACAGCAGT | 229   |
| 21 | CAGCAGTAAGATTAGGGATGAAG | 245   |
| 22 | CAGCAGTAAGATTAGGGATGAAG | 246   |

**D**

| Nº | siRNA | Homeologous            | Target Name                              | E-value    | ID |
|----|-------|------------------------|------------------------------------------|------------|----|
| 1  | 9     | <i>F.viridisWRKY1</i>  | maker-Fvb4-4-augustus-gene-72.68-mRNA-1  | 6.71529E-5 | 23 |
| 2  | 9     | <i>F.vescaWRKY1</i>    | maker-Fvb4-3-augustus-gene-105.32-mRNA-1 | 6.71529E-5 | 23 |
| 3  | 9     | <i>F.niponicaWRKY1</i> | maker-Fvb4-2-augustus-gene-73.40-mRNA-1  | 6.71529E-5 | 23 |
| 4  | 10    | <i>F.viridisWRKY1</i>  | maker-Fvb4-4-augustus-gene-72.68-mRNA-1  | 6.71529E-5 | 23 |
| 5  | 10    | <i>F.vescaWRKY1</i>    | maker-Fvb4-3-augustus-gene-105.32-mRNA-1 | 6.71529E-5 | 23 |
| 6  | 10    | <i>F.niponicaWRKY1</i> | maker-Fvb4-2-augustus-gene-73.40-mRNA-1  | 6.71529E-5 | 23 |
| 7  | 11    | <i>F.viridisWRKY1</i>  | maker-Fvb4-4-augustus-gene-72.68-mRNA-1  | 6.71529E-5 | 23 |
| 8  | 11    | <i>F.vescaWRKY1</i>    | maker-Fvb4-3-augustus-gene-105.32-mRNA-1 | 6.71529E-5 | 23 |
| 9  | 11    | <i>F.niponicaWRKY1</i> | maker-Fvb4-2-augustus-gene-73.40-mRNA-1  | 6.71529E-5 | 23 |
| 10 | 12    | <i>F.viridisWRKY1</i>  | maker-Fvb4-4-augustus-gene-72.68-mRNA-1  | 6.71529E-5 | 23 |
| 11 | 12    | <i>F.vescaWRKY1</i>    | maker-Fvb4-3-augustus-gene-105.32-mRNA-1 | 6.71529E-5 | 23 |
| 12 | 12    | <i>F.niponicaWRKY1</i> | maker-Fvb4-2-augustus-gene-73.40-mRNA-1  | 6.71529E-5 | 23 |
| 13 | 13    | <i>F.vescaWRKY1</i>    | maker-Fvb4-3-augustus-gene-105.32-mRNA-1 | 6.71529E-5 | 23 |
| 14 | 13    | <i>F.niponicaWRKY1</i> | maker-Fvb4-2-augustus-gene-73.40-mRNA-1  | 6.71529E-5 | 23 |
| 15 | 14    | <i>F.vescaWRKY1</i>    | maker-Fvb4-3-augustus-gene-105.32-mRNA-1 | 6.71529E-5 | 23 |
| 16 | 14    | <i>F.niponicaWRKY1</i> | maker-Fvb4-2-augustus-gene-73.40-mRNA-1  | 6.71529E-5 | 23 |
| 17 | 15    | <i>F.vescaWRKY1</i>    | maker-Fvb4-2-augustus-gene-73.40-mRNA-1  | 6.71529E-5 | 23 |
| 18 | 16    | <i>F.viridisWRKY1</i>  | maker-Fvb4-4-augustus-gene-72.68-mRNA-1  | 6.71529E-5 | 23 |
| 19 | 16    | <i>F.vescaWRKY1</i>    | maker-Fvb4-3-augustus-gene-105.32-mRNA-1 | 6.71529E-5 | 23 |
| 20 | 16    | <i>F.niponicaWRKY1</i> | maker-Fvb4-2-augustus-gene-73.40-mRNA-1  | 6.71529E-5 | 23 |
| 21 | 17    | <i>F.viridisWRKY1</i>  | maker-Fvb4-4-augustus-gene-72.68-mRNA-1  | 6.71529E-5 | 23 |
| 22 | 17    | <i>F.vescaWRKY1</i>    | maker-Fvb4-3-augustus-gene-105.32-mRNA-1 | 6.71529E-5 | 23 |
| 23 | 17    | <i>F.niponicaWRKY1</i> | maker-Fvb4-2-augustus-gene-73.40-mRNA-1  | 6.71529E-5 | 23 |
| 24 | 18    | <i>F.viridisWRKY1</i>  | maker-Fvb4-4-augustus-gene-72.68-mRNA-1  | 6.71529E-5 | 23 |
| 25 | 18    | <i>F.vescaWRKY1</i>    | maker-Fvb4-3-augustus-gene-105.32-mRNA-1 | 6.71529E-5 | 23 |
| 26 | 18    | <i>F.niponicaWRKY1</i> | maker-Fvb4-2-augustus-gene-73.40-mRNA-1  | 6.71529E-5 | 23 |
| 27 | 19    | <i>F.viridisWRKY1</i>  | maker-Fvb4-4-augustus-gene-72.68-mRNA-1  | 6.71529E-5 | 23 |
| 28 | 19    | <i>F.vescaWRKY1</i>    | maker-Fvb4-3-augustus-gene-105.32-mRNA-1 | 6.71529E-5 | 23 |
| 29 | 19    | <i>F.niponicaWRKY1</i> | maker-Fvb4-2-augustus-gene-73.40-mRNA-1  | 6.71529E-5 | 23 |
| 30 | 20    | <i>F.viridisWRKY1</i>  | maker-Fvb4-4-augustus-gene-72.68-mRNA-1  | 6.71529E-5 | 23 |
| 31 | 20    | <i>F.vescaWRKY1</i>    | maker-Fvb4-3-augustus-gene-105.32-mRNA-1 | 6.71529E-5 | 23 |
| 32 | 20    | <i>F.niponicaWRKY1</i> | maker-Fvb4-2-augustus-gene-73.40-mRNA-1  | 6.71529E-5 | 23 |
| 33 | 21    | <i>F.viridisWRKY1</i>  | maker-Fvb4-4-augustus-gene-72.68-mRNA-1  | 6.71529E-5 | 23 |
| 34 | 21    | <i>F.vescaWRKY1</i>    | maker-Fvb4-3-augustus-gene-105.32-mRNA-1 | 6.71529E-5 | 23 |
| 35 | 21    | <i>F.niponicaWRKY1</i> | maker-Fvb4-2-augustus-gene-73.40-mRNA-1  | 6.71529E-5 | 23 |
| 36 | 22    | <i>F.viridisWRKY1</i>  | maker-Fvb4-4-augustus-gene-72.68-mRNA-1  | 6.71529E-5 | 23 |
| 37 | 22    | <i>F.vescaWRKY1</i>    | maker-Fvb4-3-augustus-gene-105.32-mRNA-1 | 6.71529E-5 | 23 |
| 38 | 22    | <i>F.niponicaWRKY1</i> | maker-Fvb4-2-augustus-gene-73.40-mRNA-1  | 6.71529E-5 | 23 |

**Figure S4: Candidate DNA fragments of the strawberry FaWRKY1 for dsRNA production (siRNAs).** (A) and (B) indicate the sequence and the position of each predicted siRNA within the 272 bp DNA fragment of the FaWRKY1 used for the construction of the corresponding intragenic dsRNAi inducing cassettes, and (C) and (D) BLAST of each candidate dsRNAi inducing sequence against v1.0.a1 Transcripts database indicating the identity with its corresponding homoeologous in the *Fragaria ananassa* genome. Predicted siRNA sequence were obtained by using the InvivoGen siRNA Wizard software 3.1.(A) and siRNA at Whitehead (B). Search parameters of the BLAST search against *Fragaria x ananassa* Camarosa Genome transcripts database were adjusted to the short sequence (e-value 0,05 and Match/Mismatch Scores 2/-3).



**FigureS5 Candidate DNA fragments of the strawberry FaNPR31 gene for dsRNA production (siRNAs).****A**

| Nº | Sequence (5'-3')       | Start |
|----|------------------------|-------|
| 1  | GGCATTAGACTCGGATGATGT  | 2     |
| 2  | GCATTAGACTCGGATGATGT   | 3     |
| 3  | GAGTATGTTGAACCTTGTA    | 14    |
| 4  | GAGTCGAATATAACCTTAGAT  | 48    |
| 5  | GTCGAATATAACCTTAGATGA  | 50    |
| 6  | GAAGCCCATGCTCTCACTAT   | 69    |
| 7  | GCCTACTGTGATCCTAAGGTT  | 96    |
| 8  | GGTCTGGGTATGGCTGATGTT  | 132   |
| 9  | GTCTGGGTATGGCTGATGTTA  | 133   |
| 10 | GGGTATGGCTGATGTTAACT   | 137   |
| 11 | GCTGATGTTAACTTCGTAAT   | 144   |
| 12 | GGGTTATACCGTGCTTCATAT  | 170   |
| 13 | GGTTATACCGTGCTTCATATT  | 171   |
| 14 | GCGCAGAGAGCCATCAATAAT  | 200   |
| 15 | GATGGTCAAAGTGCAAGTTAGT | 267   |
| 16 | GGTCAAAGTGCAAGTTAGTATT | 270   |
| 17 | GTTGACAAGGGCAAAGGACTA  | 299   |
| 18 | GACAAGGGCAAAGGACTATCA  | 302   |
| 19 | GGGCAAAGGACTATCATTCAA  | 307   |
| 20 | GGCAAAGGACTATCATTCAAA  | 308   |

**C**

| Nº siRNA | Homeologous            | Target Name                              | E-value     | ID |
|----------|------------------------|------------------------------------------|-------------|----|
| 1        | <i>F.iumaeNPR31</i>    | maker-Fvb3-2-augustus-gene-63.42-mRNA-1  | 0.000819148 | 21 |
| 2        | <i>F.niponicaNPR31</i> | maker-Fvb3-3-augustus-gene-47.46-mRNA-1  | 0.000819148 | 21 |
| 3        | <i>F.iumaeNPR31</i>    | maker-Fvb3-2-augustus-gene-63.42-mRNA-1  | 0.000819148 | 21 |
| 4        | <i>F.niponicaNPR31</i> | maker-Fvb3-2-augustus-gene-47.46-mRNA-1  | 0.000819148 | 21 |
| 5        | <i>F.iumaeNPR31</i>    | maker-Fvb3-2-augustus-gene-63.42-mRNA-1  | 0.000819148 | 21 |
| 6        | <i>F.niponicaNPR31</i> | maker-Fvb3-3-augustus-gene-47.46-mRNA-1  | 0.000819148 | 21 |
| 7        | <i>F.iumaeNPR31</i>    | maker-Fvb3-2-augustus-gene-63.42-mRNA-1  | 0.000819148 | 21 |
| 8        | <i>F.niponicaNPR31</i> | maker-Fvb3-2-augustus-gene-47.46-mRNA-1  | 0.000819148 | 21 |
| 9        | <i>F.viridisNPR31</i>  | maker-Fvb3-1-augustus-gene-256.35-mRNA-1 | 0.000819148 | 21 |
| 10       | <i>F.iumaeNPR31</i>    | maker-Fvb3-2-augustus-gene-63.42-mRNA-1  | 0.000819148 | 21 |
| 11       | <i>F.niponicaNPR31</i> | maker-Fvb3-3-augustus-gene-47.46-mRNA-1  | 0.000819148 | 21 |
| 12       | <i>F.viridisNPR31</i>  | maker-Fvb3-1-augustus-gene-256.35-mRNA-1 | 0.000819148 | 21 |
| 13       | <i>F.iumaeNPR31</i>    | maker-Fvb3-2-augustus-gene-63.42-mRNA-1  | 0.000819148 | 21 |
| 14       | <i>F.niponicaNPR31</i> | maker-Fvb3-3-augustus-gene-47.46-mRNA-1  | 0.000819148 | 21 |
| 15       | <i>F.iumaeNPR31</i>    | maker-Fvb3-2-augustus-gene-63.42-mRNA-1  | 0.000819148 | 21 |
| 16       | <i>F.niponicaNPR31</i> | maker-Fvb3-3-augustus-gene-47.46-mRNA-1  | 0.000819148 | 21 |
| 17       | <i>F.iumaeNPR31</i>    | maker-Fvb3-2-augustus-gene-63.42-mRNA-1  | 0.00997927  | 18 |
| 18       | <i>F.niponicaNPR31</i> | maker-Fvb3-3-augustus-gene-47.46-mRNA-1  | 0.00997927  | 18 |
| 19       | <i>F.viridisNPR31</i>  | maker-Fvb3-1-augustus-gene-256.35-mRNA-1 | 0.00997927  | 18 |
| 20       | <i>F.iumaeNPR31</i>    | maker-Fvb3-2-augustus-gene-63.42-mRNA-1  | 0.00285911  | 19 |
| 21       | <i>F.niponicaNPR31</i> | maker-Fvb3-3-augustus-gene-47.46-mRNA-1  | 0.00285911  | 19 |
| 22       | <i>F.viridisNPR31</i>  | maker-Fvb3-1-augustus-gene-256.35-mRNA-1 | 0.00285911  | 19 |
| 23       | <i>F.iumaeNPR31</i>    | maker-Fvb3-2-augustus-gene-63.42-mRNA-1  | 0.000819148 | 21 |
| 24       | <i>F.niponicaNPR31</i> | maker-Fvb3-3-augustus-gene-47.46-mRNA-1  | 0.000819148 | 21 |
| 25       | <i>F.viridisNPR31</i>  | maker-Fvb3-1-augustus-gene-256.35-mRNA-1 | 0.000819148 | 21 |
| 26       | <i>F.niponicaNPR31</i> | maker-Fvb3-3-augustus-gene-47.46-mRNA-1  | 0.000819148 | 21 |
| 27       | <i>F.viridisNPR31</i>  | maker-Fvb3-1-augustus-gene-256.35-mRNA-1 | 0.000819148 | 21 |
| 28       | <i>F.iumaeNPR31</i>    | maker-Fvb3-2-augustus-gene-63.42-mRNA-1  | 0.000819148 | 21 |
| 29       | <i>F.viridisNPR31</i>  | maker-Fvb3-1-augustus-gene-256.35-mRNA-1 | 0.000819148 | 21 |
| 30       | <i>F.iumaeNPR31</i>    | maker-Fvb3-2-augustus-gene-63.42-mRNA-1  | 0.000819148 | 21 |
| 31       | <i>F.viridisNPR31</i>  | maker-Fvb3-1-augustus-gene-256.35-mRNA-1 | 0.000819148 | 21 |
| 32       | <i>F.iumaeNPR31</i>    | maker-Fvb3-2-augustus-gene-63.42-mRNA-1  | 0.000819148 | 21 |
| 33       | <i>F.niponicaNPR31</i> | maker-Fvb3-3-augustus-gene-47.46-mRNA-1  | 0.000819148 | 21 |
| 34       | <i>F.iumaeNPR31</i>    | maker-Fvb3-2-augustus-gene-63.42-mRNA-1  | 0.000819148 | 21 |
| 35       | <i>F.niponicaNPR31</i> | maker-Fvb3-3-augustus-gene-47.46-mRNA-1  | 0.000819148 | 21 |
| 36       | <i>F.viridisNPR31</i>  | maker-Fvb3-1-augustus-gene-256.35-mRNA-1 | 0.000819148 | 21 |
| 37       | <i>F.iumaeNPR31</i>    | maker-Fvb3-2-augustus-gene-63.42-mRNA-1  | 0.000819148 | 21 |
| 38       | <i>F.niponicaNPR31</i> | maker-Fvb3-3-augustus-gene-47.46-mRNA-1  | 0.000819148 | 21 |
| 39       | <i>F.viridisNPR31</i>  | maker-Fvb3-1-augustus-gene-256.35-mRNA-1 | 0.000819148 | 21 |
| 40       | <i>F.iumaeNPR31</i>    | maker-Fvb3-2-augustus-gene-63.42-mRNA-1  | 0.00997927  | 18 |
| 41       | <i>F.niponicaNPR31</i> | maker-Fvb3-3-augustus-gene-47.46-mRNA-1  | 0.00997927  | 18 |
| 42       | <i>F.viridisNPR31</i>  | maker-Fvb3-1-augustus-gene-256.35-mRNA-1 | 0.00997927  | 18 |

**B**

| Nº | Sequence (5'-3')         | Start |
|----|--------------------------|-------|
| 1  | CTCGGATGATGTTGAACCTTGTA  | 11    |
| 2  | GAGTCGAATATAACCTTAGATGA  | 48    |
| 3  | AGCCTACTGTGATCCTAAGGTTG  | 95    |
| 4  | ATGGCTGATGTTAACTTCGTAA   | 141   |
| 5  | TGGCTGATGTTAACTTCGTAAT   | 142   |
| 6  | GGCTGATGTTAACTTCGTAATC   | 143   |
| 7  | GGGTTATACCGTGCTTCATATTG  | 170   |
| 8  | TACCGTGCTTCATATTGCTGTGA  | 176   |
| 9  | CCGTGCTTCATATTGCTGTGATG  | 178   |
| 10 | GCGCAGAGAGCCATCAATAATAGT | 201   |
| 11 | GAGAGCCATCAATAATAGTATTG  | 205   |
| 12 | GAGCTGACATCAGATGGTCAAAG  | 255   |
| 13 | CTGACATCAGATGGTCAAAGTGC  | 258   |
| 14 | CAGATGGTCAAAGTGCAAGTTAGT | 265   |
| 15 | TTGACAAGGGCAAAGGACTATCA  | 300   |
| 16 | GACAAGGGCAAAGGACTATCATT  | 302   |
| 17 | GGGCAAAGGACTATCATTCAAAA  | 307   |
| 18 | AAGGACCGAATTTCATTGATGT   | 354   |
| 19 | TAGAGAGAGAAATGCGGAAGAAT  | 379   |

**D**

| Nº siRNA | Homeologous            | Target Name                              | E-value    | ID |
|----------|------------------------|------------------------------------------|------------|----|
| 1        | <i>F.iumaeNPR31</i>    | maker-Fvb3-2-augustus-gene-63.42-mRNA-1  | 6.71529E-5 | 23 |
| 2        | <i>F.niponicaNPR31</i> | maker-Fvb3-3-augustus-gene-47.46-mRNA-1  | 6.71529E-5 | 23 |
| 3        | <i>F.iumaeNPR31</i>    | maker-Fvb3-2-augustus-gene-63.42-mRNA-1  | 6.71529E-5 | 23 |
| 4        | <i>F.niponicaNPR31</i> | maker-Fvb3-3-augustus-gene-47.46-mRNA-1  | 6.71529E-5 | 23 |
| 5        | <i>F.viridisNPR31</i>  | maker-Fvb3-1-augustus-gene-256.35-mRNA-1 | 6.71529E-5 | 23 |
| 6        | <i>F.iumaeNPR31</i>    | maker-Fvb3-2-augustus-gene-63.42-mRNA-1  | 6.71529E-5 | 23 |
| 7        | <i>F.niponicaNPR31</i> | maker-Fvb3-3-augustus-gene-47.46-mRNA-1  | 6.71529E-5 | 23 |
| 8        | <i>F.iumaeNPR31</i>    | maker-Fvb3-2-augustus-gene-63.42-mRNA-1  | 6.71529E-5 | 23 |
| 9        | <i>F.viridisNPR31</i>  | maker-Fvb3-1-augustus-gene-256.35-mRNA-1 | 6.71529E-5 | 23 |
| 10       | <i>F.niponicaNPR31</i> | maker-Fvb3-3-augustus-gene-47.46-mRNA-1  | 6.71529E-5 | 23 |
| 11       | <i>F.iumaeNPR31</i>    | maker-Fvb3-2-augustus-gene-63.42-mRNA-1  | 6.71529E-5 | 23 |
| 12       | <i>F.viridisNPR31</i>  | maker-Fvb3-1-augustus-gene-256.35-mRNA-1 | 6.71529E-5 | 23 |
| 13       | <i>F.niponicaNPR31</i> | maker-Fvb3-3-augustus-gene-47.46-mRNA-1  | 6.71529E-5 | 23 |
| 14       | <i>F.iumaeNPR31</i>    | maker-Fvb3-2-augustus-gene-63.42-mRNA-1  | 6.71529E-5 | 23 |
| 15       | <i>F.viridisNPR31</i>  | maker-Fvb3-1-augustus-gene-256.35-mRNA-1 | 6.71529E-5 | 23 |
| 16       | <i>F.niponicaNPR31</i> | maker-Fvb3-3-augustus-gene-47.46-mRNA-1  | 6.71529E-5 | 23 |
| 17       | <i>F.iumaeNPR31</i>    | maker-Fvb3-2-augustus-gene-63.42-mRNA-1  | 6.71529E-5 | 23 |
| 18       | <i>F.viridisNPR31</i>  | maker-Fvb3-1-augustus-gene-256.35-mRNA-1 | 6.71529E-5 | 23 |
| 19       | <i>F.niponicaNPR31</i> | maker-Fvb3-3-augustus-gene-47.46-mRNA-1  | 6.71529E-5 | 23 |
| 20       | <i>F.iumaeNPR31</i>    | maker-Fvb3-2-augustus-gene-63.42-mRNA-1  | 6.71529E-5 | 23 |
| 21       | <i>F.viridisNPR31</i>  | maker-Fvb3-1-augustus-gene-256.35-mRNA-1 | 6.71529E-5 | 23 |
| 22       | <i>F.niponicaNPR31</i> | maker-Fvb3-3-augustus-gene-47.46-mRNA-1  | 6.71529E-5 | 23 |
| 23       | <i>F.iumaeNPR31</i>    | maker-Fvb3-2-augustus-gene-63.42-mRNA-1  | 6.71529E-5 | 23 |
| 24       | <i>F.niponicaNPR31</i> | maker-Fvb3-3-augustus-gene-47.46-mRNA-1  | 6.71529E-5 | 23 |
| 25       | <i>F.viridisNPR31</i>  | maker-Fvb3-1-augustus-gene-256.35-mRNA-1 | 6.71529E-5 | 23 |
| 26       | <i>F.iumaeNPR31</i>    | maker-Fvb3-2-augustus-gene-63.42-mRNA-1  | 6.71529E-5 | 23 |
| 27       | <i>F.niponicaNPR31</i> | maker-Fvb3-3-augustus-gene-47.46-mRNA-1  | 6.71529E-5 | 23 |
| 28       | <i>F.viridisNPR31</i>  | maker-Fvb3-1-augustus-gene-256.35-mRNA-1 | 6.71529E-5 | 23 |
| 29       | <i>F.iumaeNPR31</i>    | maker-Fvb3-2-augustus-gene-63.42-mRNA-1  | 6.71529E-5 | 23 |
| 30       | <i>F.niponicaNPR31</i> | maker-Fvb3-3-augustus-gene-47.46-mRNA-1  | 6.71529E-5 | 23 |
| 31       | <i>F.viridisNPR31</i>  | maker-Fvb3-1-augustus-gene-256.35-mRNA-1 | 6.71529E-5 | 23 |
| 32       | <i>F.iumaeNPR31</i>    | maker-Fvb3-2-augustus-gene-63.42-mRNA-1  | 6.71529E-5 | 23 |
| 33       | <i>F.niponicaNPR31</i> | maker-Fvb3-3-augustus-gene-47.46-mRNA-1  | 6.71529E-5 | 23 |
| 34       | <i>F.viridisNPR31</i>  | maker-Fvb3-1-augustus-gene-256.35-mRNA-1 | 6.71529E-5 | 23 |
| 35       | <i>F.iumaeNPR31</i>    | maker-Fvb3-2-augustus-gene-63.42-mRNA-1  | 6.71529E-5 | 23 |
| 36       | <i>F.niponicaNPR31</i> | maker-Fvb3-3-augustus-gene-47.46-mRNA-1  | 6.71529E-5 | 23 |
| 37       | <i>F.viridisNPR31</i>  | maker-Fvb3-1-augustus-gene-256.35-mRNA-1 | 6.71529E-5 | 23 |
| 38       | <i>F.iumaeNPR31</i>    | maker-Fvb3-2-augustus-gene-63.42-mRNA-1  | 6.71529E-5 | 23 |
| 39       | <i>F.niponicaNPR31</i> | maker-Fvb3-3-augustus-gene-47.46-mRNA-1  | 6.71529E-5 | 23 |
| 40       | <i>F.viridisNPR31</i>  | maker-Fvb3-1-augustus-gene-256.35-mRNA-1 | 6.71529E-5 | 23 |
| 41       | <i>F.iumaeNPR31</i>    | maker-Fvb3-2-augustus-gene-63.42-mRNA-1  | 6.71529E-5 | 23 |
| 42       | <i>F.niponicaNPR31</i> | maker-Fvb3-3-augustus-gene-47.46-mRNA-1  | 6.71529E-5 | 23 |
| 43       | <i>F.viridisNPR31</i>  | maker-Fvb3-1-augustus-gene-256.35-mRNA-1 | 6.71529E-5 | 23 |
| 44       | <i>F.iumaeNPR31</i>    | maker-Fvb3-2-augustus-gene-63.42-mRNA-1  | 6.71529E-5 | 23 |
| 45       | <i>F.niponicaNPR31</i> | maker-Fvb3-3-augustus-gene-47.46-mRNA-1  | 6.71529E-5 | 23 |
| 46       | <i>F.viridisNPR31</i>  | maker-Fvb3-1-augustus-gene-256.35-mRNA-1 | 6.71529E-5 | 23 |

**Figure S5: Candidate DNA fragments of the strawberry FaNPR3.1 for dsRNA production (siRNAs).** (A) and (B) indicate the sequence and the position of each predicted siRNA within the 407 bp DNA fragment of the FaNPR3.1 used for the construction of the corresponding intragenic dsRNAi inducing cassettes, and (C) and (D) BLAST of each candidate dsRNA inducing sequence against v1.0.a1 Transcripts database indicating the identity with its corresponding homoeologous in the *F. x ananassa* genome. Predicted siRNA sequence were obtained by using the InvivoGen siRNA Wizard software 3.1.(A) and siRNA at Whitehead (B). Search parameters of the BLAST search against *Fragaria x ananassa* Camarosa Genome transcripts database were adjusted to the short sequence (e-value 0,05 and Match/Mismatch Scores 2/-3).



| Majority                 | ATGATGGCTCTTATTATCATGCCCTCTCGGATTCAGGTGAATCGCTGCGAGCCGGCACTTATCACACGACGAAAAACAACACCATACGAAACAAAGCTACTGTGCGGATATCGACAAACCAAGGGCTCAGATTCATGTTCCATTATCATATGTCTTACA | 10  | 20  | 30  | 40  | 50  | 60  | 70  | 80  | 90  | 100 | 110 | 120 | 130 | 140 | 150 | 160 |
|--------------------------|-----------------------------------------------------------------------------------------------------------------------------------------------------------------|-----|-----|-----|-----|-----|-----|-----|-----|-----|-----|-----|-----|-----|-----|-----|-----|
| FvAAT2_FvH4_2g2440       | ATGATGGCTCTTATTATCATGCCCTCTCGGATTCAGGTGAATCGCTGCGAGCCGGCACTTATCACACGACGAAAAACAACACCATACGAAACAAAGCTACTGTGCGGATATCGACAAACCAAGGGCTCAGATTCATGTTCCATTATCATATGTCTTACA | 160 |     |     |     |     |     |     |     |     |     |     |     |     |     |     |     |
| FaAAT2_163.27 (vesca)    | ATGATGGCTCTTATTATCATGCCCTCTCGGATTCAGGTGAATCGCTGCGAGCCGGCACTTATCACACGACGAAAAACAACACCATACGAAACAAAGCTACTGTGCGGATATCGACAAACCAAGGGCTCAGATTCATGTTCCATTATCATATGTCTTACA | 160 |     |     |     |     |     |     |     |     |     |     |     |     |     |     |     |
| FaAAT2_151.28 (viridis)  | ATGACGGTCTTATTATCATGCCCTCTCGGATTCAGGTGAATCGCTGCGAGCCGGCACTTATCACACGACGAAAAACAACACCATACGAAACAAAGCTACTGTGCGGATATCGACAAACCAAGGGCTCAGATTCATGTTCCATTATCATATGTCTTACA  | 160 |     |     |     |     |     |     |     |     |     |     |     |     |     |     |     |
| FaAAT2_254.28 (niponica) | ---ATGGCTCTATTG---CGCTCTCGCATTCAGGTGAATCACTTCGAGCTGCACTTATAACGCCGCAAGGCAACACCGCTCGAAATGAAGCTGTGTGCGAATATCGACGACCGCAATGCTTCAGGTCTCATGTGCCATTATCATATGTCTTACA      | 154 |     |     |     |     |     |     |     |     |     |     |     |     |     |     |     |
| Majority                 | AGAACAATCCTTCAATATCATCGAAACAAAATGACCGCTGCGAGATGATTATTGACGCGCTGAGTAGAGCACTGGAGTTTATACCTCTTGGCTGGTAGGCTAAGGGAAGTGCACAAACAGAAAGCTTGTGTGGATGCACCGGAGAGGCTTCTTGTT    | 170 | 180 | 190 | 200 | 210 | 220 | 230 | 240 | 250 | 260 | 270 | 280 | 290 | 300 | 310 | 320 |
| FvAAT2_FvH4_2g2440       | AGAACAATCCTTCAATATCATCGAAACAAAATGACCGCTGCGAGATGATTATTGACGCGCTGAGTAGAGCACTGGAGTTTATACCTCTTGGCTGGTAGGCTAAGGGAAGTGCACAAACAGAAAGCTTGTGTGGATGCACCGGAGAGGCTTCTTGTT    | 320 |     |     |     |     |     |     |     |     |     |     |     |     |     |     |     |
| FaAAT2_163.27 (vesca)    | AGAACAATCCTTCAATATCATCGAAACAAAATGACCGCTGCGAGATGATTATTGACGCGCTGAGTAGAGCACTGGAGTTTATACCTCTTGGCTGGTAGGCTAAGGGAAGTGCACAAACAGAAAGCTTGTGTGGATGCACCGGAGAGGCTTCTTGTT    | 320 |     |     |     |     |     |     |     |     |     |     |     |     |     |     |     |
| FaAAT2_151.28 (viridis)  | AGAACAATCCTTCAATATCATCGAAACAAAATGACCGCTGCGAGATGATTATTGACGCGCTGAGTAGAGCACTGGAGTTTATACCTCTTGGCTGGTAGGCTAAGGGAAGTGCACAAACAGAAAGCTTGTGTGGATGCACCGGAGAGGCTTCTTGTT    | 320 |     |     |     |     |     |     |     |     |     |     |     |     |     |     |     |
| FaAAT2_254.28 (niponica) | AGAACAATCATTTCAATCTGTGGAACCAACGACCGCTGAGTGAATAGGATCGCTGAGCAAGGCACTTCAGTTTATACCTCTTGGCTGGTAGGCTAGGAGGGGCTTACAAAAGCTTATGTTGGATGCACCGGAGAGGCACTTCTTGTT             | 314 |     |     |     |     |     |     |     |     |     |     |     |     |     |     |     |
| Majority                 | CGTCGAGGCAATGCCAATCATCAGCTCGACGAACTCGGTGATGCAATTCTACCACCTTGTCTATTCTTAGACGAGTTCCTGTTTAACTGCCAGGATCTGATGGTATTCTTGTTCTCCTTTGTTGTTAATACAGGTAACCCGCTGTCTATGTGGAGGT   | 330 | 340 | 350 | 360 | 370 | 380 | 390 | 400 | 410 | 420 | 430 | 440 | 450 | 460 | 470 | 480 |
| FvAAT2_FvH4_2g2440       | CGTCGAGGCAATGCCAATCATCAGCTCGACGAACTCGGTGATGCAATTCTACCACCTTGTCTATTCTTAGACGAGTTCCTGTTTAACTGCCAGGATCTGATGGTATTCTTGTTCTCCTTTGTTGTTAATACAGGTAACCCGCTGTCTATGTGGAGGT   | 480 |     |     |     |     |     |     |     |     |     |     |     |     |     |     |     |
| FaAAT2_163.27 (vesca)    | CGTCGAGGCAATGCCAATCATCAGCTCGACGAACTCGGTGATGCAATTCTACCACCTTGTCTATTCTTAGACGAGTTCCTGTTTAACTGCCAGGATCTGATGGTATTCTTGTTCTCCTTTGTTGTTAATACAGGTAACCCGCTGTCTATGTGGAGGT   | 480 |     |     |     |     |     |     |     |     |     |     |     |     |     |     |     |
| FaAAT2_151.28 (viridis)  | CGTCGAGGCAATGCCAAGATCAGCTCGACGAACTCGGTGATGCAATTCTACCACCTTGTCTATTCTTAGACGAGTTCCTGTTTAACTGCCAGGATCTGATGGTATTCTTGTTCTCCTTTGTTGTTAATACAGGTAACCCGCTGTCTATGTGGAGGT    | 480 |     |     |     |     |     |     |     |     |     |     |     |     |     |     |     |
| FaAAT2_254.28 (niponica) | CGTTGAGGCAACGCGGAATGCACATCGACGAACTCGGGATGCAATTCTACCGCTTTGTCTATTCTAGATGGTTTCTGTTTAACTGCCAGGCTGATGGTATTCTTGTTCTCCTTTGTTGTTAATACAGGTAACCCGCTGTCTATGTGGAGGT         | 474 |     |     |     |     |     |     |     |     |     |     |     |     |     |     |     |
| Majority                 | TTCATATTTGCAATGCGTTTAAACACACAATGTGTGACACATTGTGGCTTGGTACAATTCTTGAAGGCAGTAGGGAGATTGCCAAGCAAGATGCACCATCTTCTCCACAGTGTGGGAACGACAGCTCTTGAACGCTCGAGAACCCCAATAATT       | 490 | 500 | 510 | 520 | 530 | 540 | 550 | 560 | 570 | 580 | 590 | 600 | 610 | 620 | 630 | 640 |
| FvAAT2_FvH4_2g2440       | TTCATATTTGCAATGCGTTTAAACACACAATGTGTGACACATTGTGGCTTGGTACAATTCTTGAAGGCAGTAGGGAGATTGCCAAGCAAGATGCACCATCTTCTCCACAGTGTGGGAACGACAGCTCTTGAACGCTCGAGAACCCCAATAATT       | 640 |     |     |     |     |     |     |     |     |     |     |     |     |     |     |     |
| FaAAT2_163.27 (vesca)    | TTCATATTTGCAATGCGTTTAAACACACAATGTGTGACACATTGTGGCTTGGTACAATTCTTGAAGGCAGTAGGGAGATTGCCAAGCAAGATGCACCATCTTCTCCACAGTGTGGGAACGACAGCTCTTGAACGCTCGAGAACCCCAATAATT       | 640 |     |     |     |     |     |     |     |     |     |     |     |     |     |     |     |
| FaAAT2_151.28 (viridis)  | TTTCATTTTGCAATGCGTTTAAACACACAATGTGTGACACATTGTGGCTTGGTACAATTCTTGAAGGCAGTAGGGAGATTGCCAAGCAAGATGCACCATCTTCTCCACAGTGTGGGAACGACAGCTCTTGAACGCTCGAGAACCCCAATAATT       | 640 |     |     |     |     |     |     |     |     |     |     |     |     |     |     |     |
| FaAAT2_254.28 (niponica) | TTTATATTTGCAATGCGCTTAAACACACAATATGCGATGCACTTGGCTTGGTACAATTCTTGAAGGCAGTAGGGAGATTGCCAAGCAAGATGCACCATCTTATACACAGTGTGGGAACGACAGCTCTTGAAGCCTCGAGATCCCAACGAATT        | 634 |     |     |     |     |     |     |     |     |     |     |     |     |     |     |     |
| Majority                 | CTTGACACATCATGAATTTGATGATACCATTGACCCCTTGTGTCTGAAATCTTCTGCAACAATCAACGATCTTTCTGTTTGTGTTGCCAAGGAGATAAAGGCCCTCAAGGACCATCTTCTCCACACCTTTCTACTTGTTCATCCACATTTGAAGTGAT  | 650 | 660 | 670 | 680 | 690 | 700 | 710 | 720 | 730 | 740 | 750 | 760 | 770 | 780 | 790 | 800 |
| FvAAT2_FvH4_2g2440       | CTTGACACATCATGAATTTGATGATACCATTGACCCCTTGTGTCTGAAATCTTCTGCAACAATCAACGATCTTTCTGTTTGTGTTGCCAAGGAGATAAAGGCCCTCAAGGAC                                                |     |     |     |     |     |     |     |     |     |     |     |     |     |     |     |     |



(Cont)

|                          |                                                                                                                                                                  |      |
|--------------------------|------------------------------------------------------------------------------------------------------------------------------------------------------------------|------|
| Majority                 | TTTCGGATAACACAAGAACAGGTTTGGGAGGAATTGATTTTCGGGTGGGGAAGCCAGTATATGCTGGAGTTGCTAAGTCCATCGATCTTATTAGCTTCTATGTCAGGAAAAACAACAAAGAGGAGAAATATGAGATTTTGGTACCATTATGCTTGCCATT |      |
|                          | 1130 1140 1150 1160 1170 1180 1190 1200 1210 1220 1230 1240 1250 1260 1270 1280                                                                                  |      |
| FvAAT2_FvH4_2g2440       | TTTCGGATAACACAAGAACAGGTTTGGGAGGAATTGATTTTCGGGTGGGGAAGCCAGTATATGCTGGAGTTGCTAAGTCCATCGATCTTATTAGCTTCTATGTCAGGAAAAACAACAAAGAGGAGAAATATGAGATTTTGGTACCATTATGCTTGCCATT | 1280 |
| FaAAT2_163.27 (vesca)    | TTTCGGATAACACAAGAACAGGTTTGGGAGGAATTGATTTTCGGGTGGGGAAGCCAGTATATGCTGGAGTTGCTAAGTCCATCGATCTTATTAGCTTCTATGTCAGGAAAAACAACAAAGAGGAGAAATATGAGATTTTGGTACCATTATGCTTGCCATT | 1280 |
| FaAAT2_151.28 (viridis)  | TTTCGGATAACACAAGAACAGGTTTGGGAGGAATTGATTTTCGGGTGGGGAAGCCAGTATATGCTGGAGTTGCTAAGTCCATCGATCTTATTAGCTTCTATGTCAGGAAAAACAACAAAGAGGAGAAATATGAGATTTTGGTACCATTATGCTTGCCATT | 1280 |
| FaAAT2_254.28 (niponica) | TTTCGGATAACACAAGAACAGGTTTGGGAGGATCGATTTTGGGTTCGGAAAGCCAGTGTATGCTGGAGTTGCCAAGTCCACCGATCTGATCAGCTTCTATGTCAGGAGCACAACAAAGAGAGAGA---GAAATCTTGGTGCCAGTATGCTTGCCATT    | 1271 |
| Majority                 | ATCGTCCATGGAGAGGTTTCAGCAAGAGTTCAAGAAGATGATTAGTTTGGACAAAGTGGAAATGTCATCATATATATGTAATTCATATTAA                                                                      |      |
|                          | 1290 1300 1310 1320 1330 1340 1350 1360 1370                                                                                                                     |      |
| FvAAT2_FvH4_2g2440       | ATCGTCCATGGAGAGGTTTCAGCAAGAGTTCAAGAAGATGATTAGTTTGGACAAAGTGGAAATGTCATCATATATATGTAATTCATATTAA                                                                      |      |
| FaAAT2_163.27 (vesca)    | ATCGTCCATGGAGAGGTTTCAGCAAGAGTTCAAGAAGATGATTAGTTTGGACAAAGTGGAAATGTCATCATATATATGTAATTCATATTAA                                                                      | 1371 |
| FaAAT2_151.28 (viridis)  | ATCGTCCATGGAGAGGTTTCAGCAAGAGTTCAAGAAGATGATTAGTTTGGACAAAGTGGAAATGTCATCATATATATGTAATTCATATTAA                                                                      | 1371 |
| FaAAT2_254.28 (niponica) | ATCGTCCATGGAGAGGTTTCAGCAAGAGTTCAAGAAGATGATTAGTTTGGACAAAGTGGAAATGTCATCATATATATGTAATTCATATTAA                                                                      | 1371 |

**Figure S6:** Alignment of the coding DNA sequence of the strawberry AAT2 genes. Alignment of the 1371 bp DNA fragment corresponding to coding sequence of the FvAAT2 (FvH4\_5g24240) with its respective homeologous of *F. x ananassa* FaAAT2\_163.27, maker-Fvb5-1-snap-gene-163.27-mRNA-1 (Vesca homeologous); FaAAT2\_151.28, maker-Fvb5-2-snap-gene-151.28-mRNA-1 (Viridis homeologous); and FaAAT2\_254.28 maker-Fvb3-3-augustus-gene-254.28-mRNA-1 (niponica homeologous).

Figure S7: Alignment of the coding DNA sequence of the strawberry DOF2 genes.

|                          |                                                                                                                                                                   |     |
|--------------------------|-------------------------------------------------------------------------------------------------------------------------------------------------------------------|-----|
| Majority                 | ATGTTTCACAGCTCCAGTTCTCGAACAGATGCTTCAATGTCAATCCGGACAACCAATTGATCATGAATTCXAXAAGCCCTTCGTGGAAGCCXACGTCGAGATCGCTCCXAACTGCCCCCGGTGCGCGTCTTCCAACACCAAGTTCTGCTACTACAACAACT |     |
|                          | 10 20 30 40 50 60 70 80 90 100 110 120 130 140 150 160                                                                                                            |     |
| FvDOF2_FvH4_2g14390      | ATGTTTCACAGCGCCAGTTCTCGAACAGATGCTTCAATGTCAATCCGGACAACCAATTGATCATGAATTCXAXAAGCCCTTCGTGGAAGCCXACGTCGAGATCGCTCCXAACTGCCCCCGGTGCGCGTCTTCCAACACCAAGTTCTGCTACTACAACAACT | 160 |
| FaDOF2_120.17 (vesca)    | ATGTTTCACAGCTCCAGTTCTCGAACAGATGCTTCAATGTCAATCCGGACAACCAATTGATCATGAATTCXAXAAGCCCTTCGTGGAAGCCXACGTCGAGATCGCTCCXAACTGCCCCCGGTGCGCGTCTTCCAACACCAAGTTCTGCTACTACAACAACT | 160 |
| FaDOF2_128.9 (viridis)   | ATGTTTCACAGCTCCAGTTCTCGAACAGATGCTTCAATGTCAATCCGGACAACCAATTGATCATGAATTCXAXAAGCCCTTCGTGGAAGCCXACGTCGAGATCGCTCCXAACTGCCCCCGGTGCGCGTCTTCCAACACCAAGTTCTGCTACTACAACAACT | 160 |
| FaDOF2_109.16 (liunumae) | ATGTTTCACAGCTCCAGTTCTCGAACAGATGCTTCAATGTCAATCCGGACAACCAATTGATCATGAATTCXAXAAGCCCTTCGTGGAAGCCXACGTCGAGATCGCTCCXAACTGCCCCCGGTGCGCGTCTTCCAACACCAAGTTCTGCTACTACAACAACT | 160 |
| Majority                 | ACAGCCTCTCACAGCCTCGCTACTTCTGCAAAGGCTGCCGGAGATACTGGACCAAAGGCGGGTCTTAXAGGAACGTCCCGCTGCGCGGCGGTGTAGAAAAGAACCGCCGACGAGGTCXGCCAGXCTCTCGCAGGCTGACCGGATXTCGATGAGTTACTA   |     |
|                          | 170 180 190 200 210 220 230 240 250 260 270 280 290 300 310 320                                                                                                   |     |
| FvDOF2_FvH4_2g14390      | ACAGCCTCTCACAGCCTCGCTACTTCTGCAAAGGCTGCCGGAGATACTGGACCAAAGGCGGGTCTTAXAGGAACGTCCCGCTGCGCGGCGGTGTAGAAAAGAACCGCCGACGAGGTCXGCCAGGCTCTCGCAGGCTGACCGGATXTCGATGAGTTACTA   | 320 |
| FaDOF2_120.17 (vesca)    | ACAGCCTCTCACAGCCTCGCTACTTCTGCAAAGGCTGCCGGAGATACTGGACCAAAGGCGGGTCTTAXAGGAACGTCCCGCTGCGCGGCGGTGTAGAAAAGAACCGCCGACGAGGTCXGCCAGGCTCTCGCAGGCTGACCGGATXTCGATGAGTTACTA   | 320 |
| FaDOF2_128.9 (viridis)   | ACAGCCTCTCACAGCCTCGCTACTTCTGCAAAGGCTGCCGGAGATACTGGACCAAAGGCGGGTCTTAXAGGAACGTCCCGCTGCGCGGCGGTGTAGAAAAGAACCGCCGACGAGGTCXGCCAGGCTCTCGCAGGCTGACCGGATXTCGATGAGTTACTA   | 320 |
| FaDOF2_109.16 (liunumae) | ACAGCCTCTCACAGCCTCGCTACTTCTGCAAAGGCTGCCGGAGATACTGGACCAAAGGCGGGTCTTAXAGGAACGTCCCGCTGCGCGGCGGTGTAGAAAAGAACCGCCGACGAGGTCXGCCAGGCTCTCGCAGGCTGACCGGATXTCGATGAGTTACTA   | 320 |
| Majority                 | TCGTCGCAACAGCTCGAGTAGTAGCGGTGATGATCTGTCCGAGCAGCACTCCAAGGAAGGAGCCAAACGGGTGGATATCGACATGGCTGCTGTGTTTGCTAATTTCTTGAACCAAACTCTXGCAACGGACATGATCCCAATXTGGTTGGATCAGAATCG   |     |
|                          | 330 340 350 360 370 380 390 400 410 420 430 440 450 460 470 480                                                                                                   |     |
| FvDOF2_FvH4_2g14390      | TCGTCGCAACAGCTCGAGTAGTAGCGGTGATGATCTGTCCGAGCAGCACTCCAAGGAAGGAGCCAAACGGGTGGATATCGACATGGCTGCTGTGTTTGCTAATTTCTTGAACCAAACTCTXGCAACGGACATGATCCCAATXTGGTTGGATCAGAATCG   | 480 |
| FaDOF2_120.17 (vesca)    | TCGTCGCAACAGCTCGAGTAGTAGCGGTGATGATCTGTCCGAGCAGCACTCCAAGGAAGGAGCCAAACGGGTGGATATCGACATGGCTGCTGTGTTTGCTAATTTCTTGAACCAAACTCTXGCAACGGACATGATCCCAATXTGGTTGGATCAGAATCG   | 480 |
| FaDOF2_128.9 (viridis)   | TCGTCGCAACAGCTCGAGTAGTAGCGGTGATGATCTGTCCGAGCAGCACTCCAAGGAAGGAGCCAAACGGGTGGATATCGACATGGCTGCTGTGTTTGCTAATTTCTTGAACCAAACTCTXGCAACGGACATGATCCCAATXTGGTTGGATCAGAATCG   | 480 |
| FaDOF2_109.16 (liunumae) | TCGTCGCAACAGCTCGAGTAGTAGCGGTGATGATCTGTCCGAGCAGCACTCCAAGGAAGGAGCCAAACGGGTGGATATCGACATGGCTGCTGTGTTTGCTAATTTCTTGAACCAAACTCTXGCAACGGACATGATCCCAATXTGGTTGGATCAGAATCG   | 480 |
| Majority                 | ATCCCTGATGATGTTTCATGAGCAAAATGCATTATCCGATCACTCCCAAAATTTCTTGAACCCCGCGGAAGATCTTCTTGAATCAGTGGAGCTACTTCAAGGACTCGTACTTCTGATCATGATCATCAACAATCACACGAAGAGGATAATTCACAATX    |     |
|                          | 490 500 510 520 530 540 550 560 570 580 590 600 610 620 630 640                                                                                                   |     |
| FvDOF2_FvH4_2g14390      | ATCCCTGATGATGTTTCATGAGCAAAATGCATTATCCGATCACTCCCAAAATTTCTTGAACCCCGCGGAAGATCTTCTTGAATCAGTGGAGCTACTTCAAGGACTCGTACTTCTGATCATGATCATCAACAATCACACGAAGAGGATAATTCACAATG    | 640 |
| FaDOF2_120.17 (vesca)    | ATCCCTGATGATGTTTCATGAGCAAAATGCATTATCCGATCACTCCCAAAATTTCTTGAACCCCGCGGAAGATCTTCTTGAATCAGTGGAGCTACTTCAAGGACTCGTACTTCTGATCATGATCATCAACAATCACACGAAGAGGATAATTCACAATG    | 640 |
| FaDOF2_128.9 (viridis)   | ATCCCTGATGATGTTTCATGAGCAAAATGCATTATCCGATCACTCCCAAAATTTCTTGAACCCCGCGGAAGATCTTCTTGAATCAGTGGAGCTACTTCAAGGACTCGTACTTCTGATCATGATCATCAACAATCACACGAAGAGGATAATTCACAATA    | 640 |
| FaDOF2_109.16 (liunumae) | ATCCCTGATGATGTTTCATGAGCAAAATGCATTATCCGATCACTCCCAAAATTTCTTGAACCCCGCGGAAGATCTTCTTGAATCAGTGGAGCTACTTCAAGGACTCGTACTTCTGATCATGATCATCAACAATCACACGAAGAGGATAATTCACAATA    | 640 |
| Majority                 | TTATGGGAAATCATCAATACCATCAGGATTTGAGTATTCATGAATTTGGTTTGCAGGCTCTGTAGACGATGAGGATGTGTTTGGTCTGATACAAACAGCAAGTTTGACCACTACTACTAGTTTCAATTGGCAAGAGTTGGATAATTCATCCCATC       |     |
|                          | 650 660 670 680 690 700 710 720 730 740 750 760 770 780 790 800                                                                                                   |     |
| FvDOF2_FvH4_2g14390      | TTATGGGAAATCATCAATACCATCAGGATTTGAGTATTCATGAATTTGGTTTGCAGGCTCTGTAGACGATGAGGATGTGTTTGGTCTGATACAAACAGCAAGTTTGACCACTAGTACTACTAGTTTCAATTGGCAAGAGTTGGATAATTCATCCCATC    | 800 |
| FaDOF2_120.17 (vesca)    | TTATGGGAAATCATCAATACCATCAGGATTTGAGTATTCATGAATTTGGTTTGCAGGCTCTGTAGACGATGAGGATGTGTTTGGTCTGATACAAACAGCAAGTTTGACCACTAGTACTACTAGTTTCAATTGGCAAGAGTTGGATAATTCATCCCATC    | 800 |
| FaDOF2_128.9 (viridis)   | TTATGGGAAATCATCAATACCATCAGGATTTGAGTATTCATGAATTTGGTTTGCAGGCTCTGTAGACGATGAGGATGTGTTTGGTCTGATACAAACAGCAAGTTTGACCACTAATACTACTAGTTTCAATTGGCAAGAGTTGGATAATTCATCCCATC    | 800 |
| FaDOF2_109.16 (liunumae) | TTATGGGAAATCATCAATACCATCAGGATTTGAGTATTCATGAATTTGGTTTGCAGGCTCTGTAGACGATGAGGATGTGTTTGGTCTGATACAAACAGCAAGTTTGACCACTAATACTACTAGTTTCAATTGGCAAGAGTTGGATAATTCATCCCATC    | 800 |
| Majority                 | TGATGATGATGATCATATGAAGATAXCGACCACCACAACGAATCTATGTAGCGAAXAAGTGGAGCTCCTTTGATTTTTCAGGCTTGGGAGTTTCTCAGGATCTTAA                                                        |     |
|                          | 810 820 830 840 850 860 870 880 890 900                                                                                                                           |     |
| FvDOF2_FvH4_2g14390      | TGATGATGATGATCATATGAAGATAXCGACCACCACAACGAATCTATGTAGCGAAXAAGTGGAGCTCCTTTGATTTTTCAGGCTTGGGAGTTTCTCAGGATCTTAA                                                        | 906 |
| FaDOF2_120.17 (vesca)    | TGATGATGATGATCATATGAAGATAXCGACCACCACAACGAATCTATGTAGCGAAXAAGTGGAGCTCCTTTGATTTTTCAGGCTTGGGAGTTTCTCAGGATCTTAA                                                        | 906 |
| FaDOF2_128.9 (viridis)   | TGATGATGATGATCATATGAAGATAXCGACCACCACAACGAATCTATGTAGCGAAXAAGTGGAGCTCCTTTGATTTTTCAGGCTTGGGAGTTTCTCAGGATCTTAA                                                        | 906 |
| FaDOF2_109.16 (liunumae) | TGATGATGATGATCATATGAAGATAXCGACCACCACAACGAATCTATGTAGCGAAXAAGTGGAGCTCCTTTGATTTTTCAGGCTTGGGAGTTTCTCAGGATCTTAA                                                        | 906 |



**Figure S7: Alignment of the coding DNA sequence of the strawberry DOF2 genes.** Alignment of the 906bp DNA fragment corresponding to the coding sequence of FvDOF2 (FvH4\_2g14390) with its respective homeologous of *F. x ananassa* FaDOF2\_120.17, snap\_masked-Fvb2-2-processed-gene-120.17-mRNA-1 (Vesca homeologous); FaDOF2\_128.9, augustus\_masked-Fvb2-3-processed-gene-128.9-mRNA-1 (Viridis homeologous); and FaDOF2\_109.16 snap\_masked-Fvb2-4-processed-gene-109.16-mRNA-1 (iinumae homeologous). All sequences were retrieved of *Fragaria vesca* v.4.0a1 and *Fragaria x ananassa* Camarosa Genome v1.0.a1 Transcripts database

**FigureS8.** Expression analysis of the strawberry FaDOF2 in green and red fruit receptacles of *F. vesca* and *F. × ananassa* cv. *Camarosa*

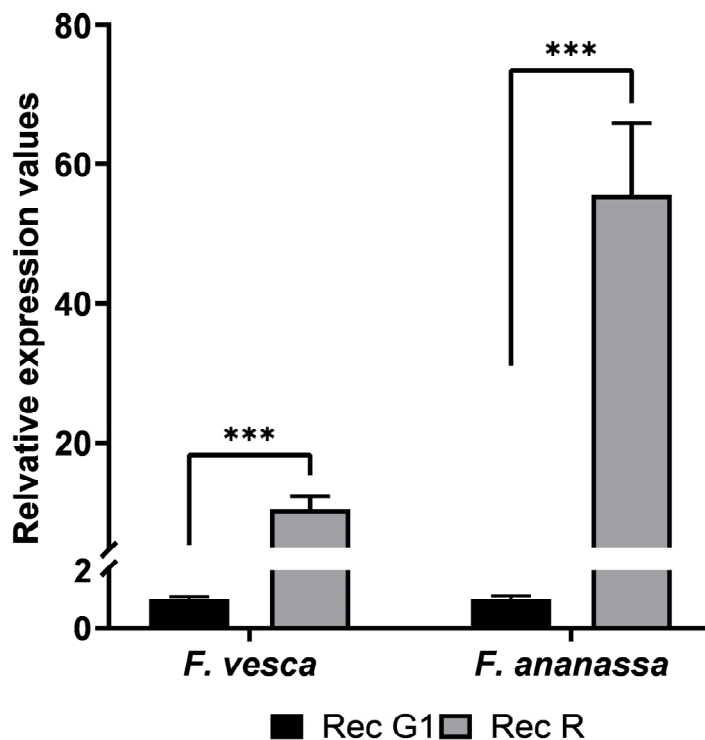

**Figure S8.** Expression analysis of the strawberry FaDOF2 in green and red fruit receptacles of *F. vesca* and *F. × ananassa* cv. *Camarosa*. qRT-PCR results were obtained using specific primers for FaDOF2 (Molina-Hidalgo et al., 2017). The increase in the mRNA value was relative to the receptacle G1 in all experiments, which was assigned an arbitrary value equal to 1. Means values  $\pm$  SD of five independent experiments are shown. Rec G1: small-sized green fruit receptacle; Rec R: red stage fruit receptacle. Statistical significance with respect to reference sample was determined by the Student's t-test in all experiments. (\*\*\*)  $p$ -value  $< 0.001$ .



**Table S1. Primers**

| Name     | Description | Chain      | RT-qPCR (5'-3')          | Observation                                                                     |
|----------|-------------|------------|--------------------------|---------------------------------------------------------------------------------|
| NptII_Fw | NPTII       | sense      | GACCACCAAGCGAAACATCG     | Amplicon of 356 bp of kanamycin cassettes in the pKGWFS7.0 used as housekeeping |
| NptII_Rv |             | anti-sense | TGCGAATCGGGAGCGGCGATACCG |                                                                                 |
| GUS_Fw   | GUS         | sense      | AATTATGCGGGCAACGTCTGGTAT | Amplicon of 203 bp of Glucuronidase gene in pKGWFS7.0                           |
| GUS_RV   |             | anti-sense | CGTACACTTTTCCCGGCAATAACA |                                                                                 |

**Table S1. Primers used in the RT-qPCR in this study**
